# Supplementary material for: The helminth parasite Fasciola hepatica modulates barrier integrity of human intestinal organoid-derived monolayers
Source: Research Square preprint supplement (doi:10.21203/rs.3.rs-8602005/v1), 2026-01-16
Supplement: Supplementary file 1 [file 879f7a14aa03bd9e36fdbde4.pdf]

## **SUPPLEMENTARY INFORMATION**

### **SUPPLEMENTARY FIGURES**

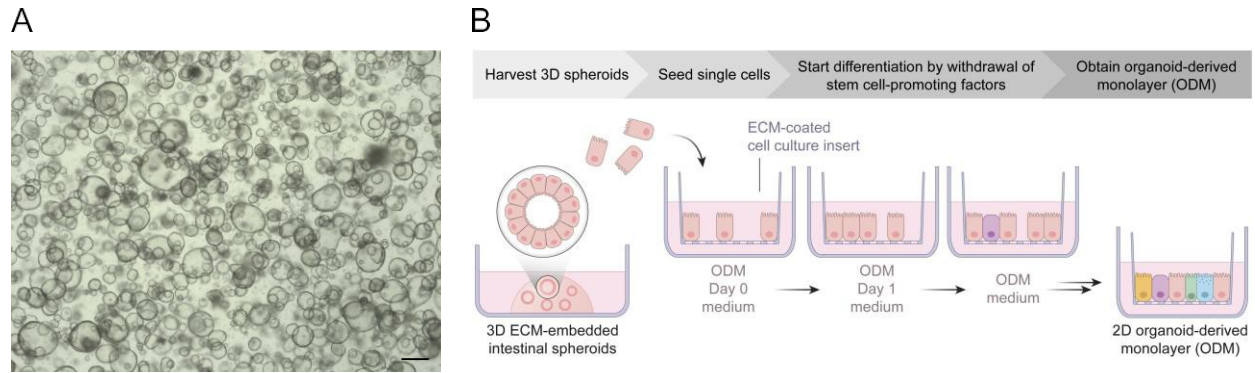

**Supplementary Figure 1. Generation of ODMs from 3D organoids derived from human duodenum samples. A)** Phase contrast image of 3D, stem-cell-enriched organoid culture at passage 23 and 10 days after seeding, derived from human duodenum biopsy samples and used for ODM generation. Scale bar, 200  $\mu$ m. **B)** Schematic representation of the experimental procedures employed for ODM generation. From Warschkau et al. (2022)<sup>64</sup>.

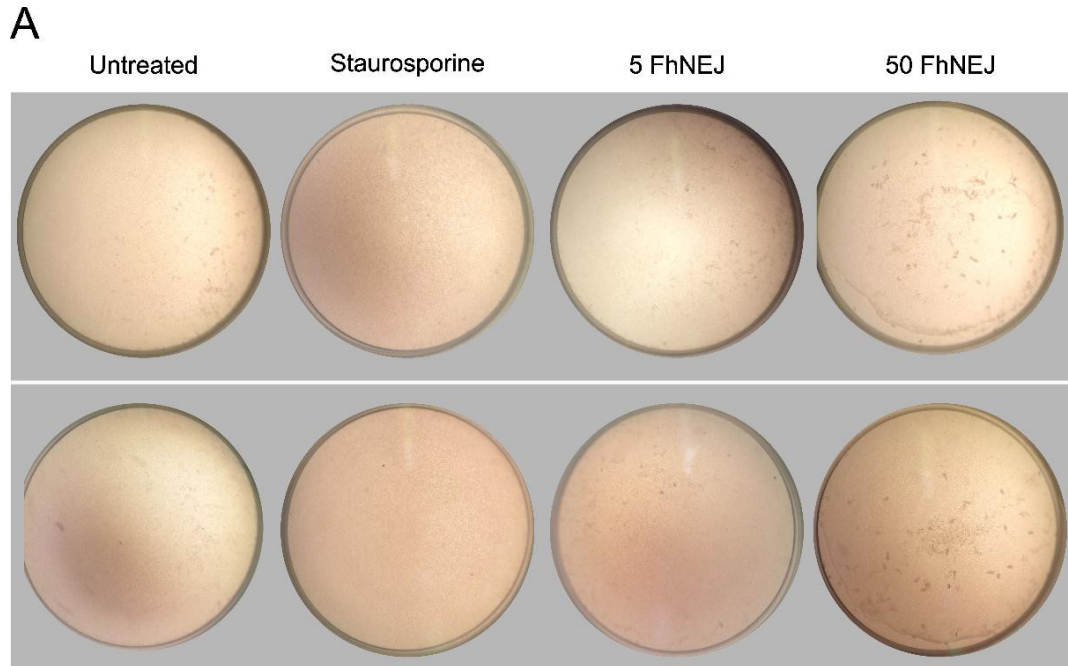

**Supplementary Figure 2. Stereoscope images of ODMs after incubation with FhNEJ.**

Images from ODMs exposed to 5 FhNEJ, 50 FhNEJ, or left untreated at 48 hours after addition of the parasites are shown for two additional independent experiments.

**A**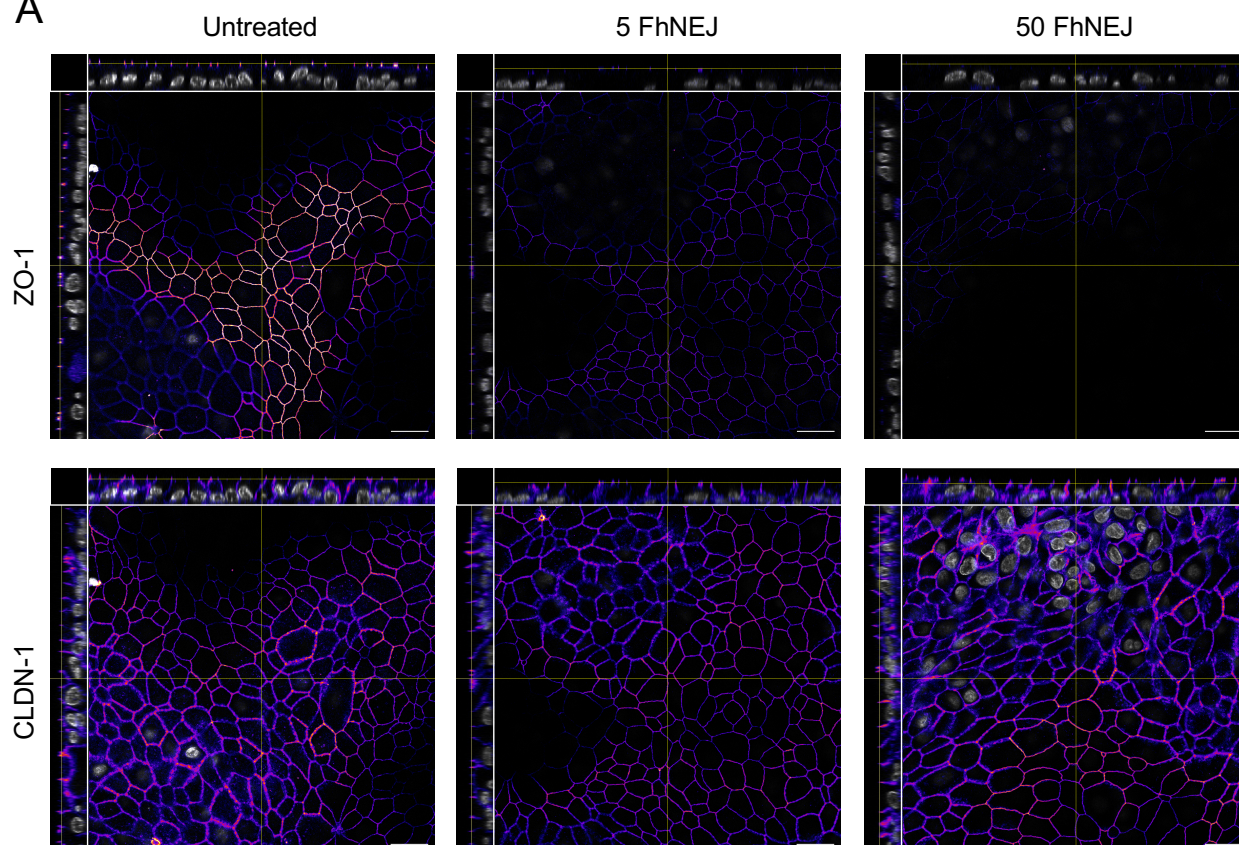**B**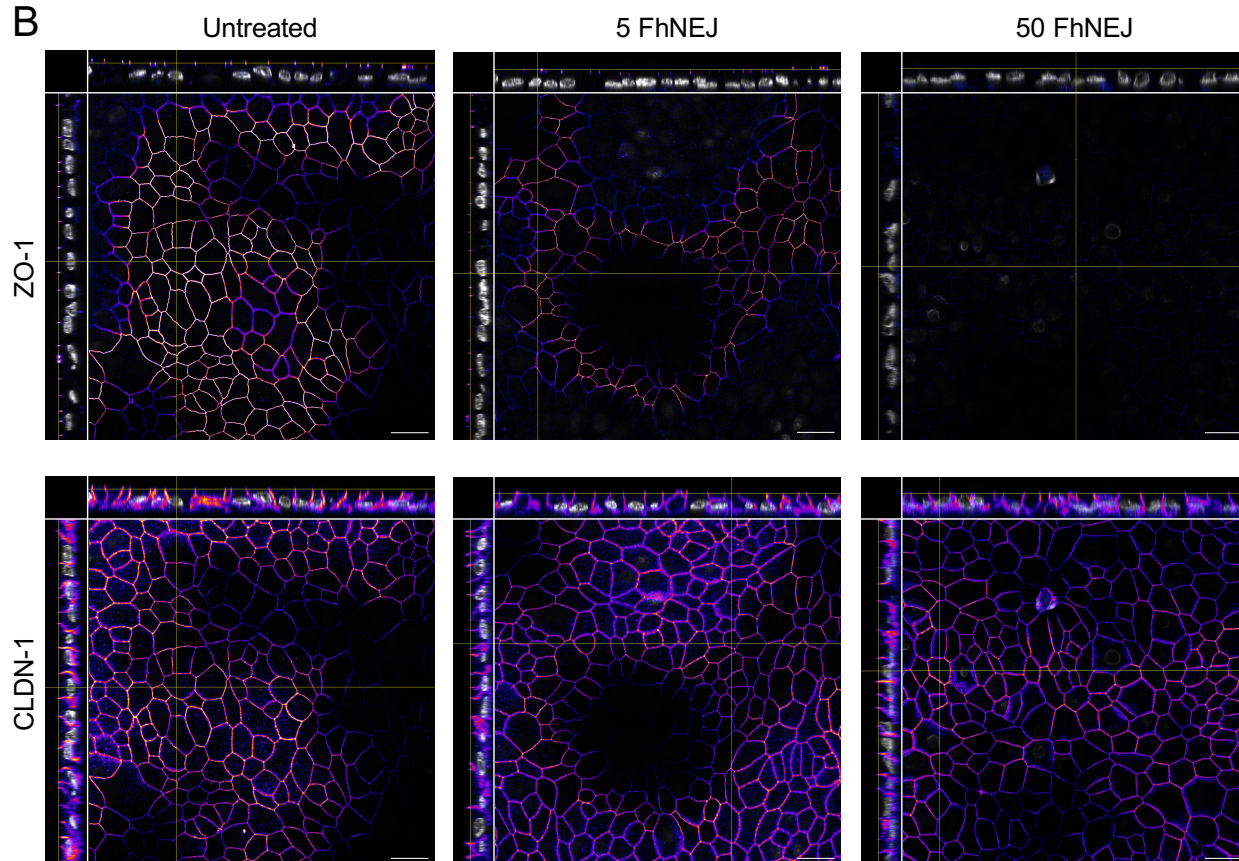

**Supplementary Figure 3. Orthogonal stacks of representative IFA images of ZO-1 and CLDN-1 48 hours after addition of FhNEJ. A,B)** Specimens from two additional experiments were visualised in a Leica Stellaris 8 confocal microscope using the 63× objective. ZO-1 and CLDN-1 are displayed with colour-coded intensities; DAPI is shown in grey. Scale bars, 20 µm. Every panel displays one independent experiments.



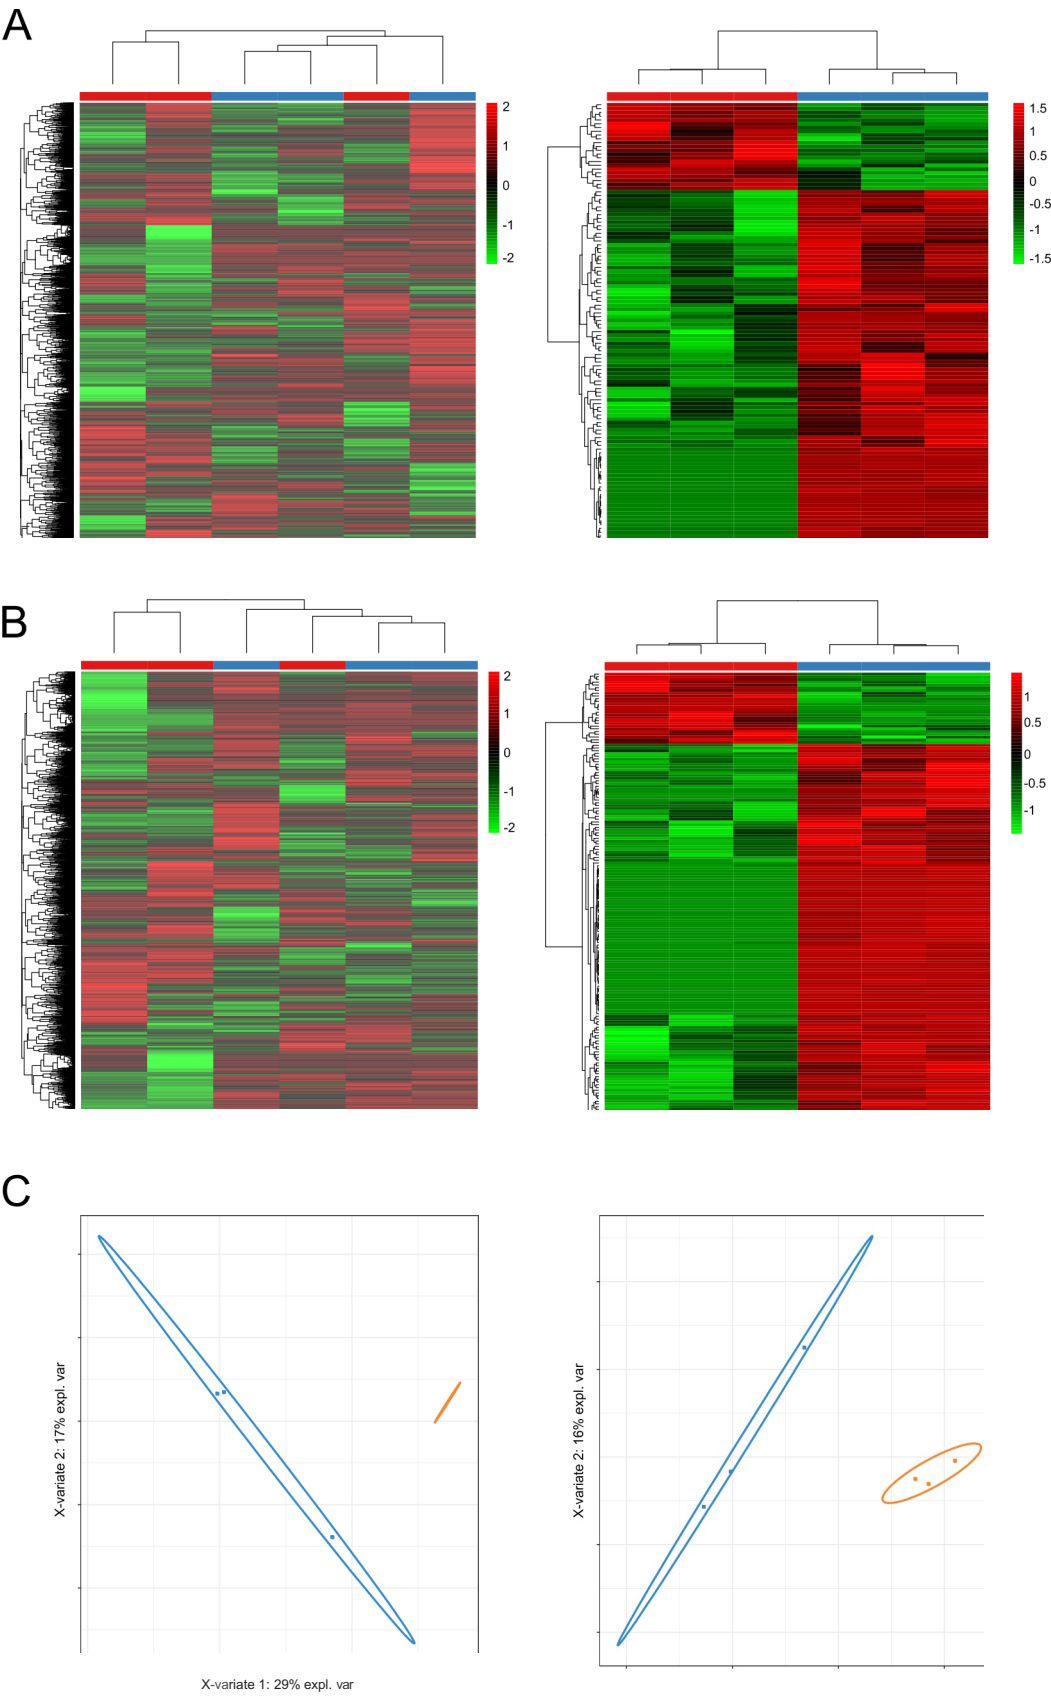

**Supplementary Figure 4. Feature selection by elastic-net and PLS-DA. A,B)** An elastic-net penalised regression model was performed to select for proteins that were specifically expressed in each experimental condition. The figures show heatmap representations of Z-score normalised protein expression levels of all the proteins identified (left panels) or proteins that were selected as specific to each experimental condition through elastic-net regularised regression (right panels), for the untreated vs. 5 FhNEJ **(A)** and untreated vs. 50 FhNEJ **(B)** comparisons. Red, untreated; blue, ODMs treated with FhNEJ. **C)** PLS-DA was performed to identify the proteins most relevant for distinguishing between experimental conditions. Only those proteins that contributed substantially to the newly projected bidimensional space (as determined by  $\text{vip} > 1.5$ ) were considered specific to each experimental condition. Plots are shown for untreated vs. 5 FhNEJ (left panel) and untreated vs. 50 FhNEJ conditions (right panel). Blue, untreated; orange, ODMs treated with FhNEJ.

## DESCRIPTION OF ADDITIONAL SUPPLEMENTARY FILES

### **File name: Supplementary Movie 1.**

Live imaging of ODMs stimulated with FhNEJ. Time-lapse imaging of ODMs from 0 to 16 hours after addition of FhNEJ showed that the parasites were alive and actively moved throughout the epithelial monolayer. One image every five minutes was acquired in a ZEISS AxioObserver.Z1 imaging system. SpyDNA555 (orange) labelled dead host cells.

**Download link:** <https://saco.csic.es/s/rnnNmSYax68JmQN>

### **File name: Supplementary Movie 2.**

Video reconstruction of all planes acquired along the entire Z stack of a fixed transwell incubated with FhNEJ, from the apical to the basal side, using a step size of 0.30  $\mu\text{m}$ . The video shows one example of FhNEJ that was recovered under the epithelial monolayer. The specimens were visualised in a Leica Stellaris 8 confocal microscope using the 40 $\times$  objective. Scale bar, 50  $\mu\text{m}$ .

**Download link:** <https://saco.csic.es/s/zm8FpeEZF6zyQLw>

### **File name: Supplementary Table 1.**

Differentially abundant proteins identified in ODMs stimulated with FhNEJ when compared to their untreated controls, including information about their functions as annotated in the Uniprot database.

**Download link:** <https://saco.csic.es/s/bdLxaDiF97t6ggo>
